# Supplementary material
Source: PubMed Central journal article supplement (PMC2860667)
Supplement: NIHMS185908-supplement-1.pdf [file NIHMS185908-supplement-1.pdf]

## **Supplementary Information**

### **The exon junction complex component *Magoh* controls brain size by regulating neural stem cell division**

Debra L. Silver, Dawn E. Watkins-Chow, Karisa C. Schreck, Tarran J. Pierfelice, Denise M. Larson, Anthony J. Burnett, Hung-Jiun Liaw, Kyungjae Myung, Christopher A. Walsh, Nicholas Gaiano, and William J. Pavan

**Supplementary Figure 1** The *Mos2* allele results in haploinsufficiency

**Supplementary Figure 2** Microcephaly and hypopigmentation in *Magoh* gene trap alleles and Tg-BAC rescue

**Supplementary Figure 3** Thickness of neuronal layers and cortex, and total number of neurons is reduced in *Magoh*<sup>Mos2/+</sup> mice

**Supplementary Figure 4** Analysis of NSC and IPC populations

**Supplementary Figure 5** Apoptosis of new neurons in *Magoh*<sup>Mos2/+</sup> embryos beginning at E11.5

**Supplementary Figure 6** Requirement of *Magoh* for mitosis *in vitro* and *in vivo*

**Supplementary Figure 7** Analysis of siRNA treated cells

**Supplementary Figure 8** Analyses of LIS1 expression and *In utero* electroporations

**Supplementary Figure 9** Model of *Magoh*<sup>Mos2/+</sup> phenotype

**Supplementary Table 1** Body and organ weights of control and *Magoh*<sup>Mos2/+</sup> animals

**Supplementary Table 2** Microarray analysis of E10.5 cortices

**Supplementary Table 3** Statistical analyses

**Supplementary Data 1** Serum chemistries, hematology, and organ weights of control and mutant animals

# SUPPLEMENTARY INFORMATION

## Supplementary Figure 1

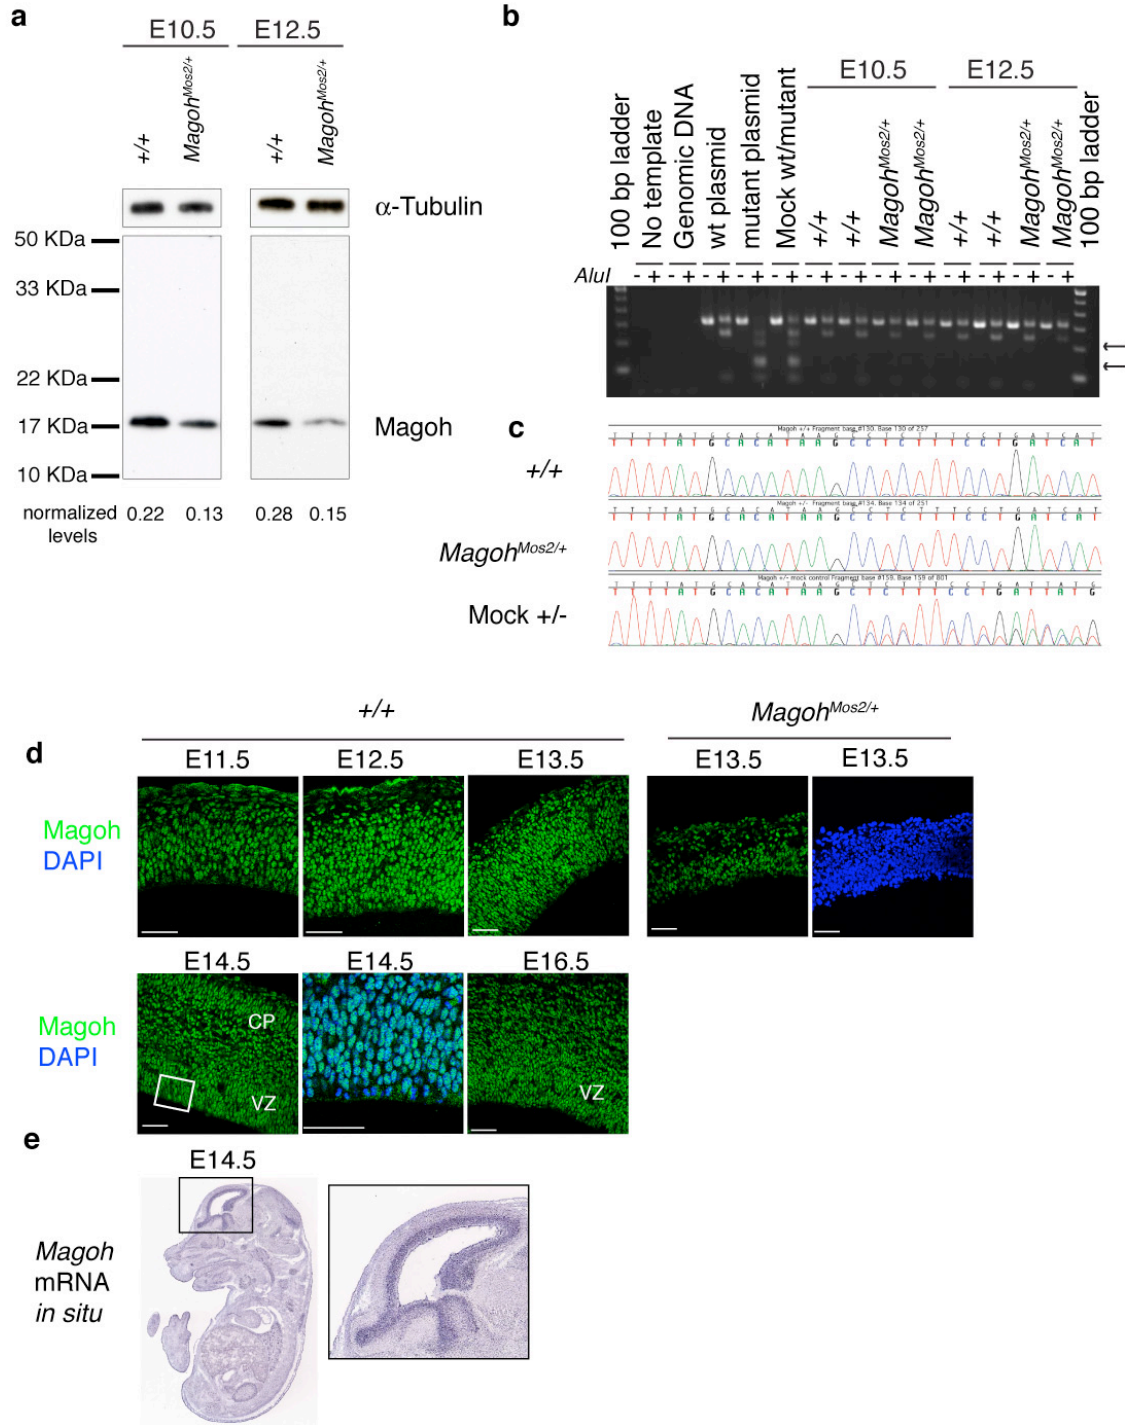

**Supplementary Figure 1 The *Mos2* allele results in haploinsufficiency. a,**

Representative Western blot analyses of E10.5 and E12.5 cortical lysates from indicated genotypes probed with anti-Magoh and anti- $\alpha$ -Tubulin, as a loading control. Below the blots are densitometry values normalized for loading. Note that in *Magoh*<sup>Mos2/+</sup>, Magoh levels (17 kDa) are reduced (approximately two-fold) and there are no aberrantly sized proteins. Similar results were seen with antibodies recognizing either the whole protein or N-terminus. **b,** RNA from E10.5 and E12.5 cortices was used for first-strand cDNA synthesis and subsequent RT-PCR amplification using primers spanning exons 1 and 4. The gel image shows undigested and *AluI* digested PCR products from the indicated templates. The *wild-type* PCR product and cDNA plasmid positive control yields the expected 313 bp and upon digestion, the expected 2 fragments (240 bp and 73 bp). The *Magoh*<sup>Mos2/+</sup> digested and undigested PCR product generates an identical pattern to wild-type. The mutant cDNA positive control yields the expected 3 fragments (126, 113, and 73 bp), due to an *AluI* site created by the *Mos2* mutation. A mock heterozygote sample, (1:1 mixture of wild-type and mutant plasmid clones before PCR amplification), generates bands expected if the *Mos2* transcript is expressed in *Magoh*<sup>Mos2/+</sup>. The *Magoh*<sup>Mos2/+</sup> samples show no evidence of the *Mos2* transcript (arrows). **c,** Sequence chromatograms of RT-PCR products from +/+ cortices (top), *Magoh*<sup>Mos2/+</sup> cortices (middle) and mock heterozygote showing double peaks beginning at 198delG mutation (bottom). Consistent with the RT-PCR data, these show no evidence of the mutant *Mos2* transcript. **d,** Confocal micrographs of coronal sections, from the indicated genotypes and ages, stained with rabbit anti-Magoh (green) and DAPI (blue). Note that MAGOH is nuclear, is expressed throughout the cortex, and is reduced in *Magoh*<sup>Mos2/+</sup> brains. At

E14.5 and E16.5, MAGOH expression is enriched in the VZ/SVZ and CP. In E14.5 images, the boxed square indicates the higher magnification image shown to the right. **e**, *Magoh* mRNA *in situ* hybridization of E14.5 sagittal section, with square indicating higher magnification image of the developing cerebral cortex. The enriched expression of *Magoh* in the VZ/SVZ is especially evident with this technique. *In situ* images were taken from Genepaint.org but also repeated to confirm the expression pattern. Scale bars=50  $\mu$ m.

## Supplementary Figure 2

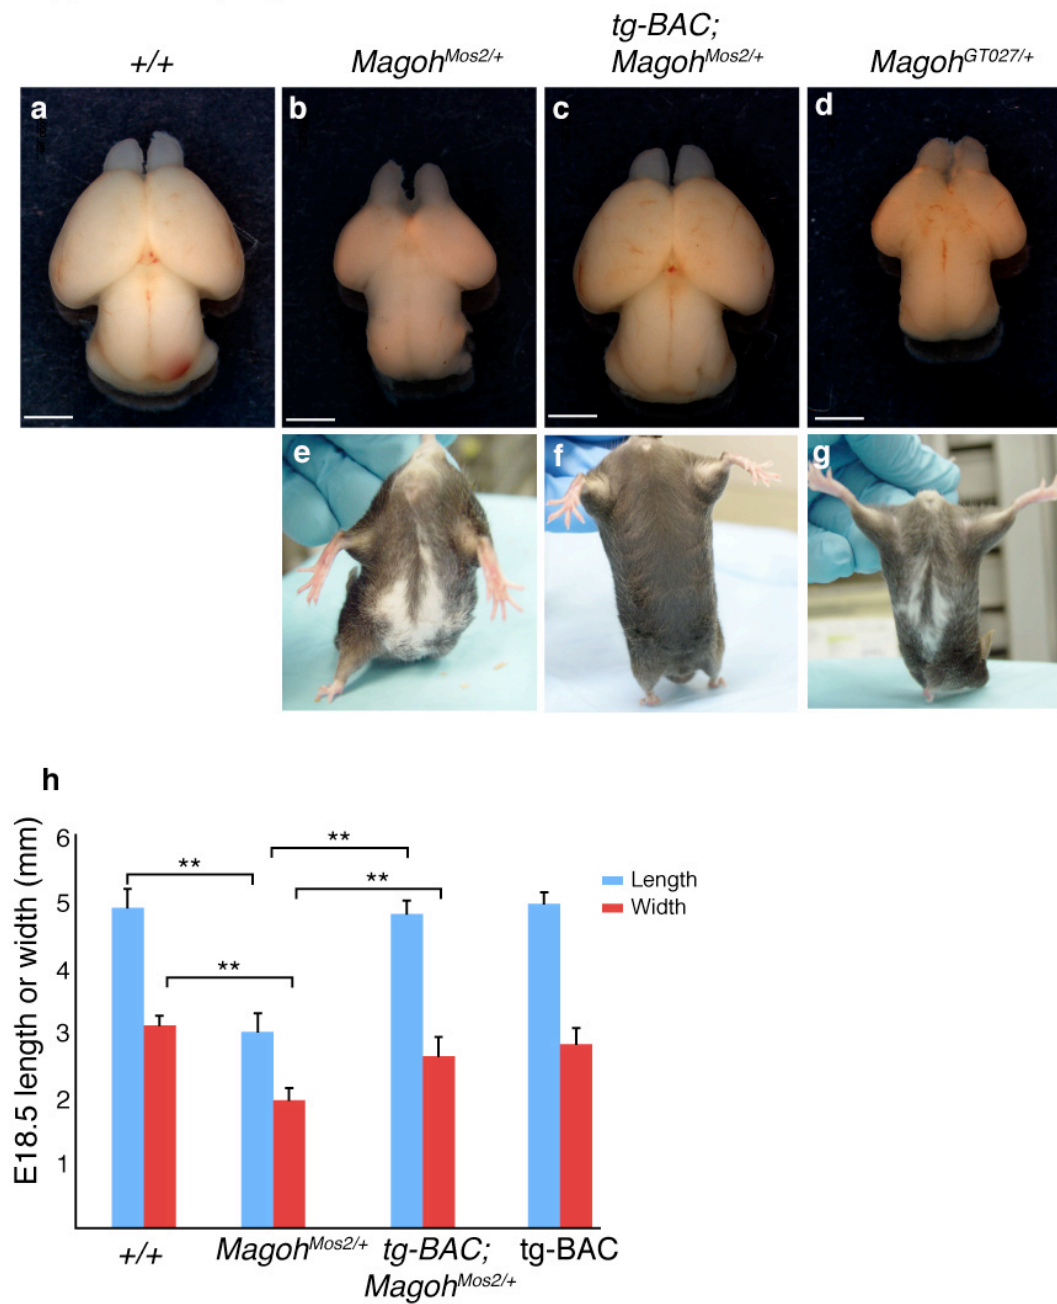

**Supplementary Figure 2 Microcephaly and hypopigmentation in *Magoh* gene trap alleles and Tg-BAC rescue.** **a-d**, Images of E18.5 brains and **(e-g)** adult pigmentation patterns from indicated genotypes. Scale bars=1 mm. **h**, Graph representing length (blue) and width (red) measurements of whole mount E18.5 brains. Shown are the average values for all embryos (n=5-8 per genotype). \*\*,  $P < 0.005$ ; Error bars, s.d.

### Supplementary Figure 3

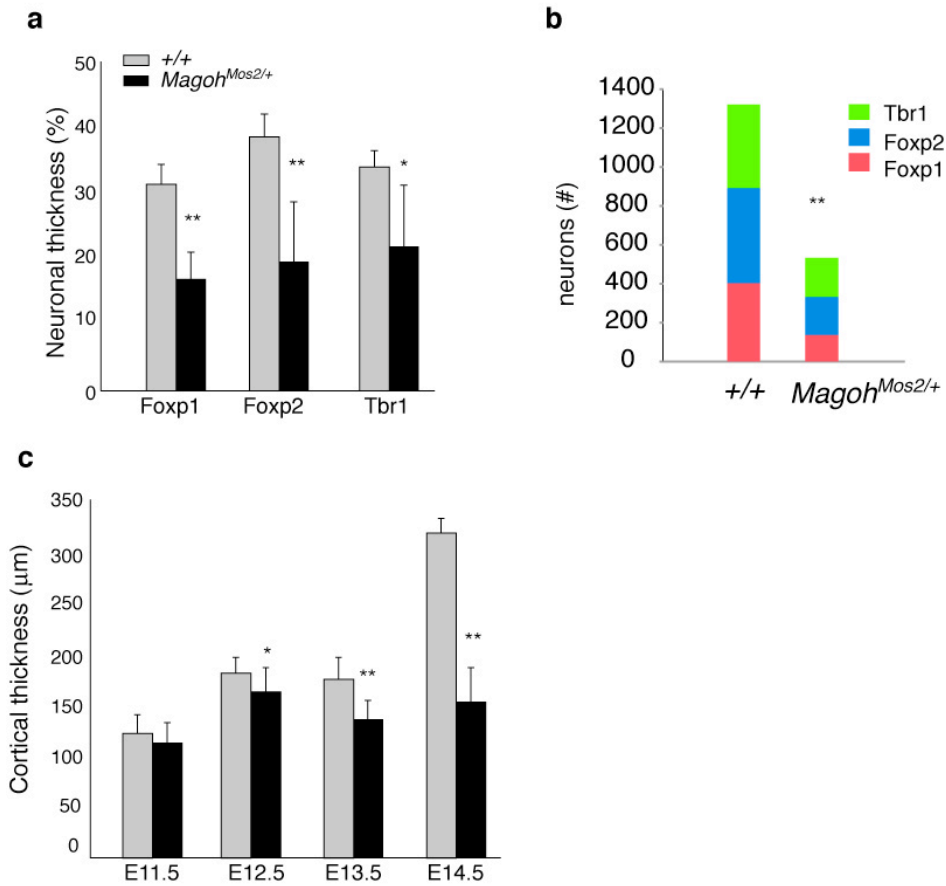

**Supplementary Figure 3 Thickness of neuronal layers and cortex, and total number of neurons is reduced in *Magoh*<sup>Mos2/+</sup> mice.** **a**, Graph representing the thickness of the neuronal layers III-VI, marked by antibodies against Fxp1, Fxp2, and Tbr1, as a percentage of total cortical thickness at E18.5. Shown are the average values for all embryos (n=2-4 per genotype, n=2-3 sections per embryo). **b**, Graph representing the average total number of Fxp1 (red), Fxp2 (blue), and Tbr1 (green) positive neurons within 450  $\mu\text{m}^2$  fields (n=3-5 sections per genotype). **c**, Graph representing cortical thickness of control (grey) and *Magoh*<sup>Mos2/+</sup> (black) brain sections at indicated ages. Shown are the average values for all embryos (n=2-4 per genotype, average 10 sections each) measured within a 318  $\mu\text{m}^2$  field. \*,  $P < 0.05$ , \*\*,  $P < 0.005$ ; Error bars, s.d.

## Supplementary Figure 4

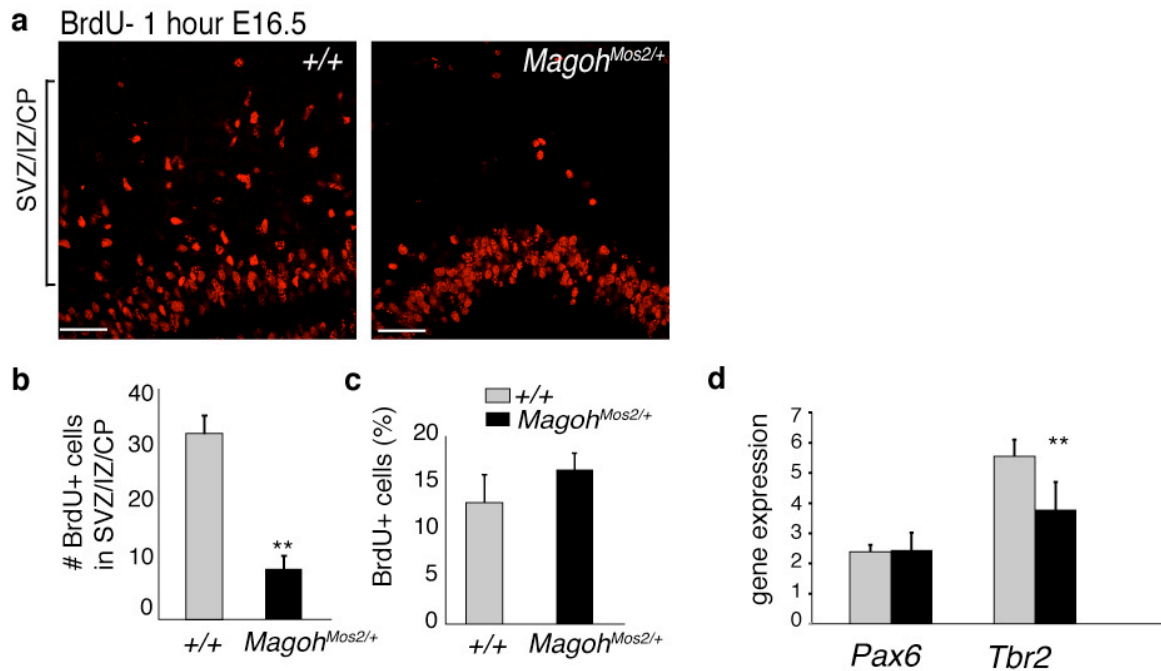

**Supplementary Figure 4 Analysis of NSC and IPC populations.** **a**, Confocal micrographs of coronal sections from indicated genotypes at E16.5, stained for BrdU (red). Pregnant females were dissected 1 hour after injection with BrdU. Scale bars= 50  $\mu\text{m}$ . **b**, Graph representing the average number of BrdU positive cells in the SVZ/IZ/CP layers as measured within a 150  $\mu\text{m}$  X 300  $\mu\text{m}$  wide field. **c**, Graph depicting the percentage of total DAPI cells that are BrdU positive measured within a 318  $\mu\text{m}^2$  field. Graphs in **(b,c)** indicate the average values for all embryos (n=2-4 per genotype, 10 sections per embryo). **d**, Graph representing quantitative gene expression of *Pax6* and *Tbr2* averaged from 4 replicates each of control (n=4) and *Magoh*<sup>Mos2/+</sup> (n=5) E12.5 cortices, as measured by quantitative real-time PCR ( $P=0.73$  and  $P<0.005$ , respectively). Expression was normalized to *Gapdh* and wild-type levels were set to 1.0. \*,  $P<0.05$ , \*\*,  $P<0.005$ ; Error bars, s.d.



Supplementary Figure 5

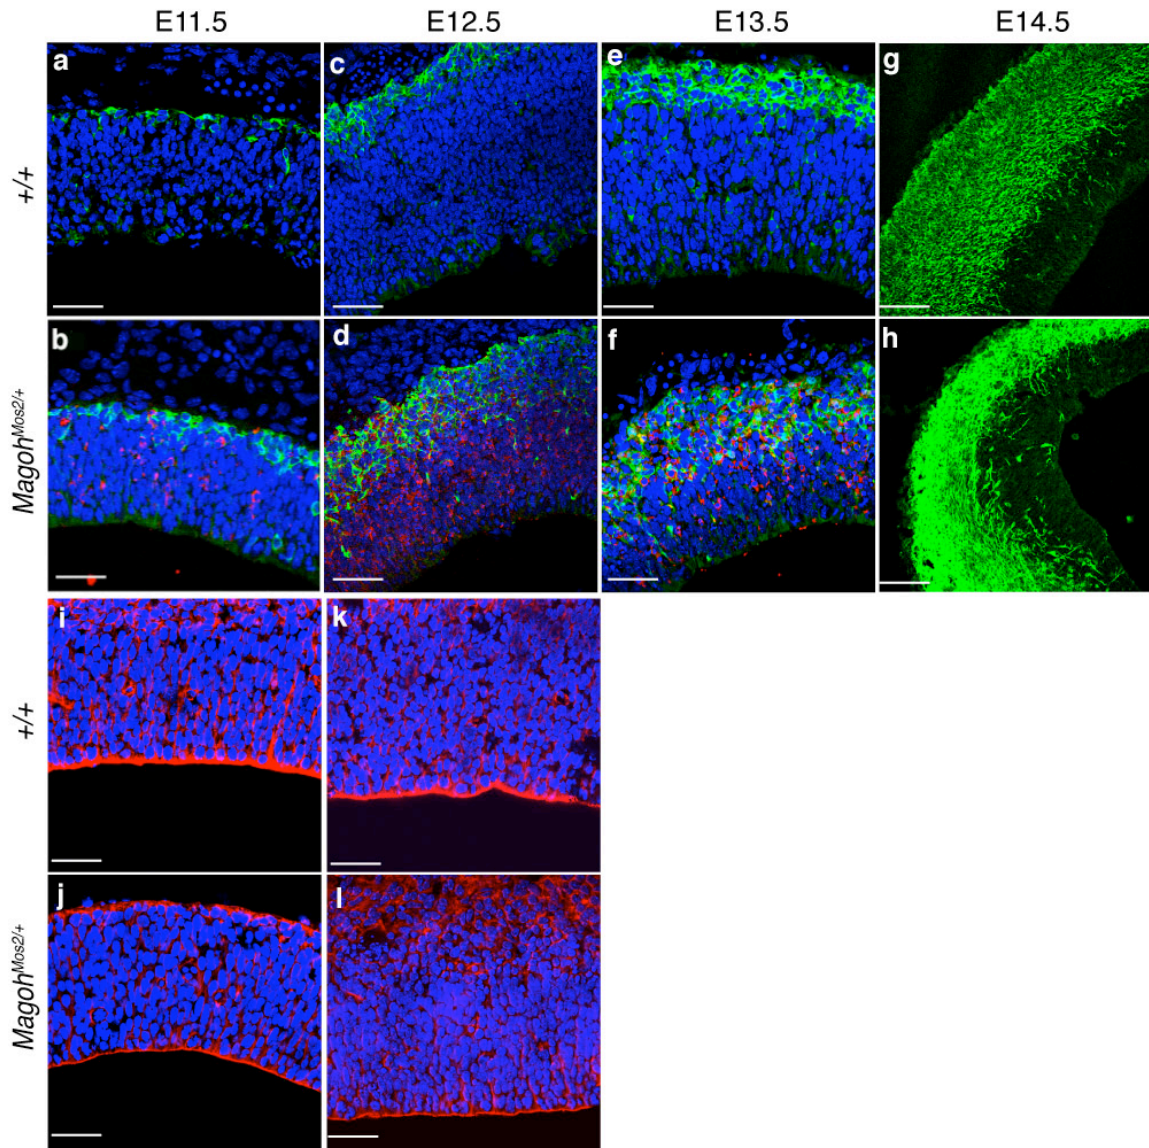

**Supplementary Figure 5 Apoptosis of new neurons in *Magoh*<sup>Mos2/+</sup> embryos beginning at E11.5.** **a-h**, Confocal micrographs of coronal sections from indicated ages and genotypes and stained for Tuj1 (green), DAPI (blue), and CC3 (red) (**a-f**), and Tuj1 (green) (**g-h**). **i-l**, Confocal micrographs of coronal sections from indicated ages and genotypes and stained for Phalloidin (red) and DAPI (blue). Note the apical membrane is intact, as seen with Phalloidin staining. Scale bars, 40  $\mu\text{m}$  (**a-f, i-l**), 80  $\mu\text{m}$  (**g, h**).

## Supplementary Figure 6

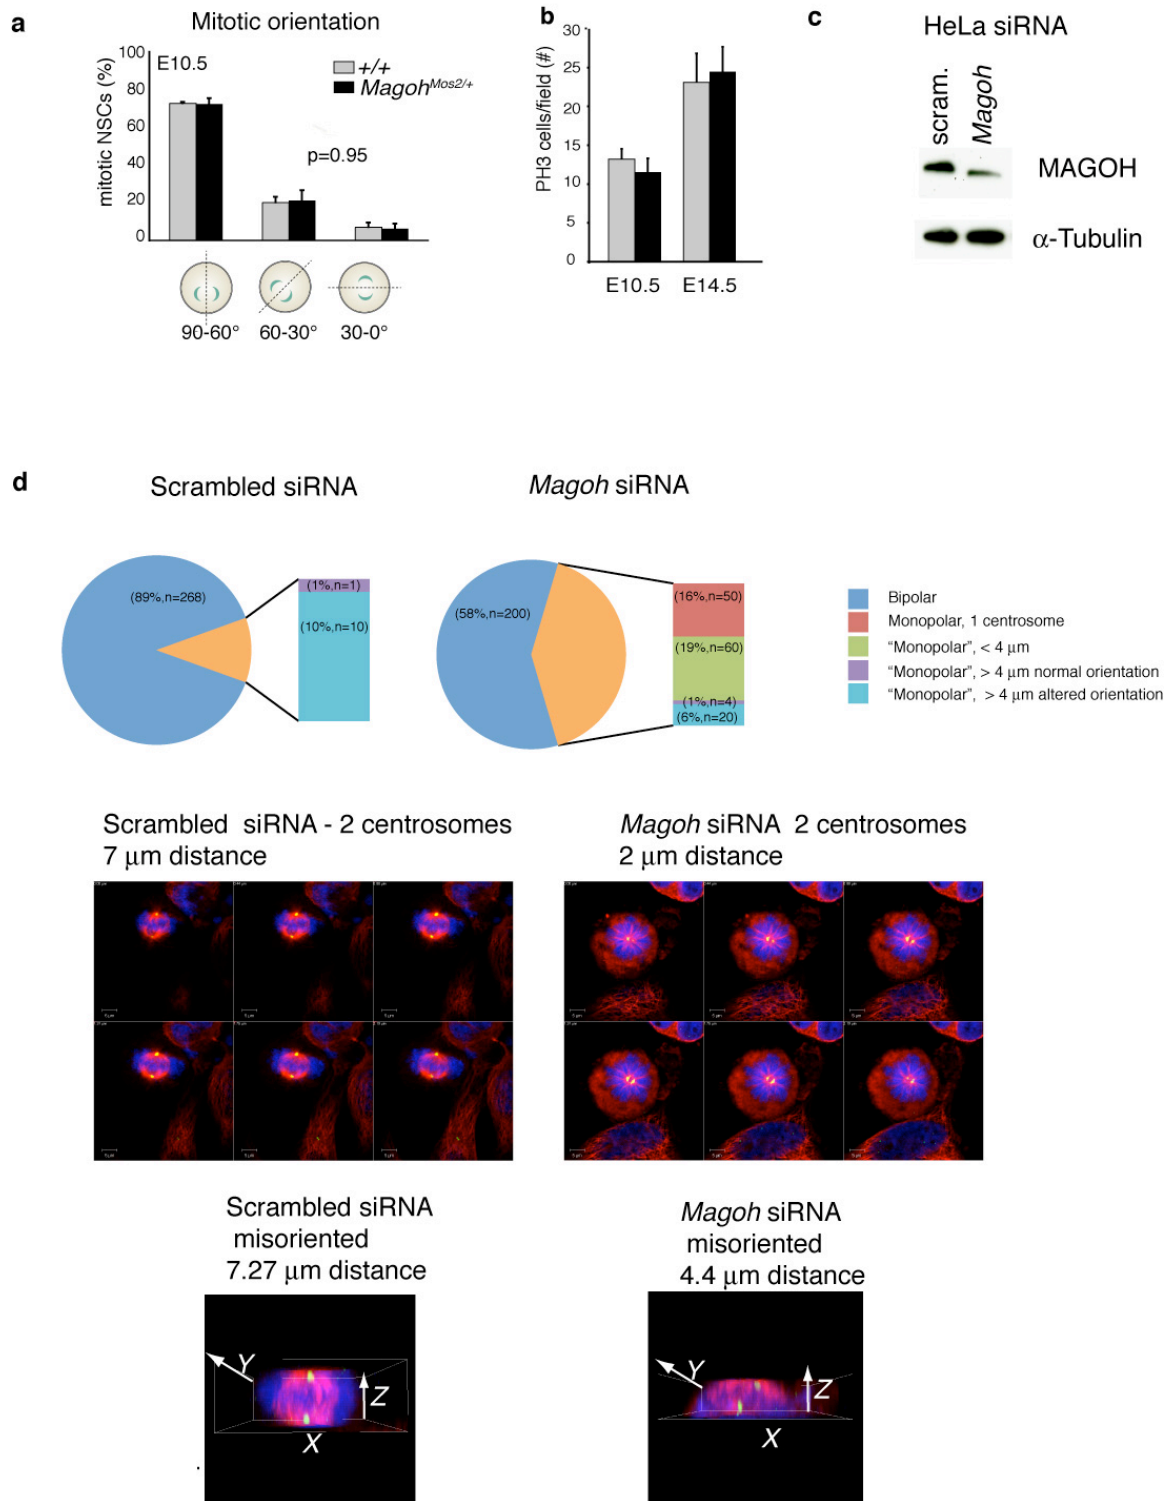

**Supplementary Figure 6 Requirement of *Magoh* for mitosis *in vitro* and *in vivo*.** **a**, Graph depicting mitotic orientation of NSCs from control (grey) and *Magoh*<sup>Mos2/+</sup> (black)

E10.5 embryos ( $P=0.95$ ). **b**, Graph depicting the number of PH3 cells at E10.5 and E12.5 ( $P=0.2642$  and  $P=0.4022$ , respectively). Error bars, s.d. **c**, Representative Western blot analyses of lysates of siRNA-treated cells probed with antibodies against Magoh (17 kDa),  $\alpha$ -Tubulin (55 kDa). MAGOH was reduced on average by 60-70%. **d**, Pie graphs and bar charts representing the distribution of indicated phenotypic classes of knockdown cells. Beneath them are confocal micrographs of 4 representative HeLa cells treated with indicated siRNAs and stained with anti- $\alpha$ -Tubulin (red), anti- $\gamma$ -Tubulin (green) and DAPI. Consecutive optical slices, with  $\mu\text{m}$  pole to pole distance indicated, demonstrate that centrosomes were in the same optical plane, and therefore not misoriented. Also shown are Z stacks with representative images of misoriented cells.

**Supplementary Figure 7**

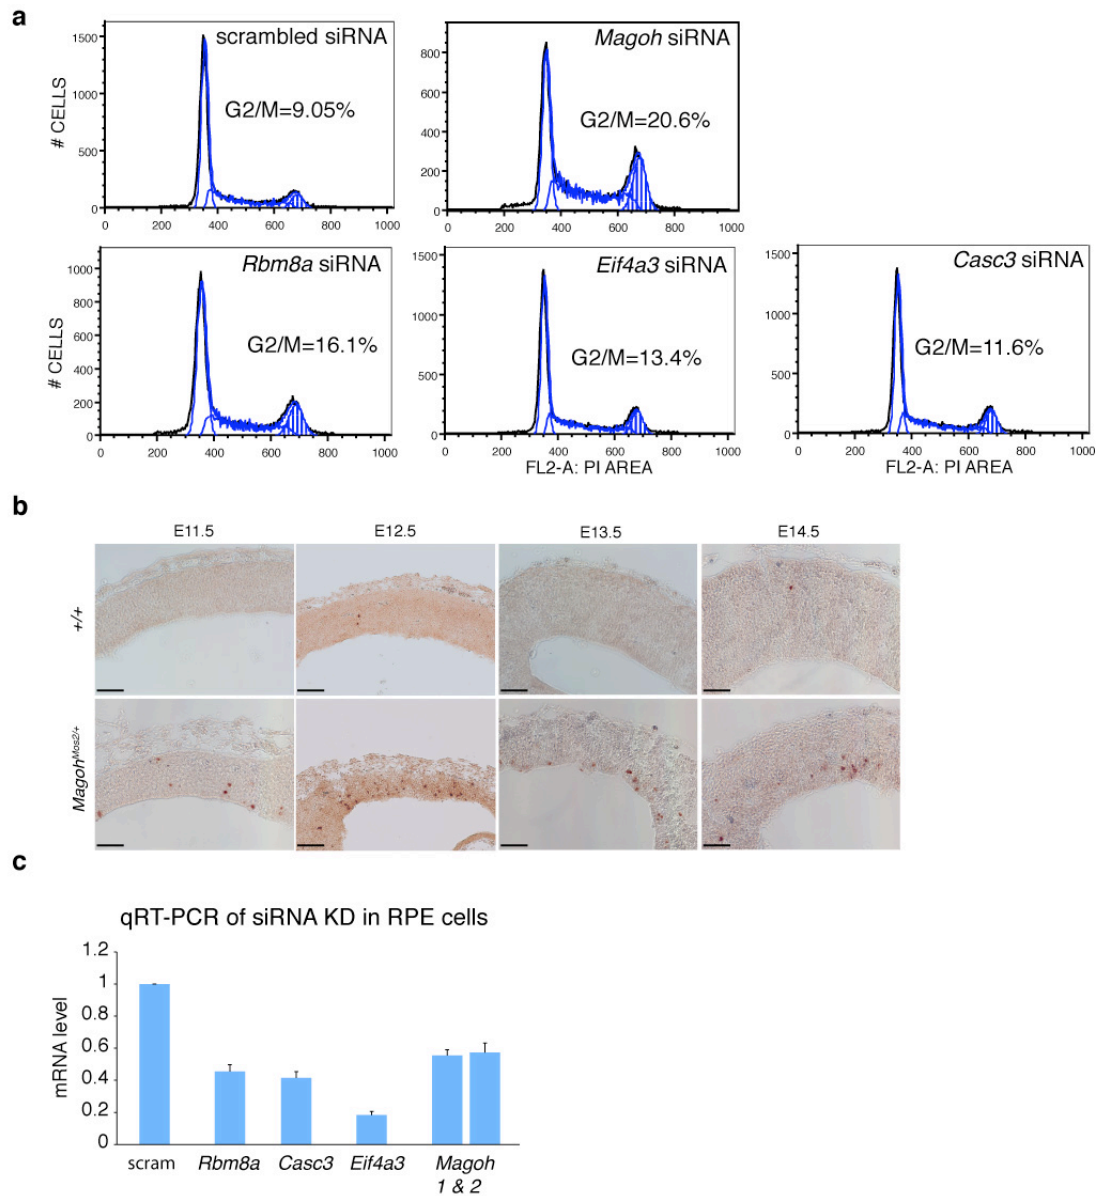

**Supplementary Figure 7 Analysis of siRNA treated cells. a**, FACS analysis of HeLa cells treated with indicated siRNAs with the percentage of G2/M cells shown. **b**, Images of coronal sections of indicated ages and genotypes stained for  $\gamma$ -H2AX (brown cells) to identify cells exhibiting spontaneous double strand DNA breaks, which are dramatically increased in *Magoh*<sup>*Mos2*+/+</sup> embryos. Scale bars, 50  $\mu$ m. **c**, Graph depicting qRT-PCR analysis of siRNA treated RPE cells. Error bars, s.d.

Supplementary Figure 8

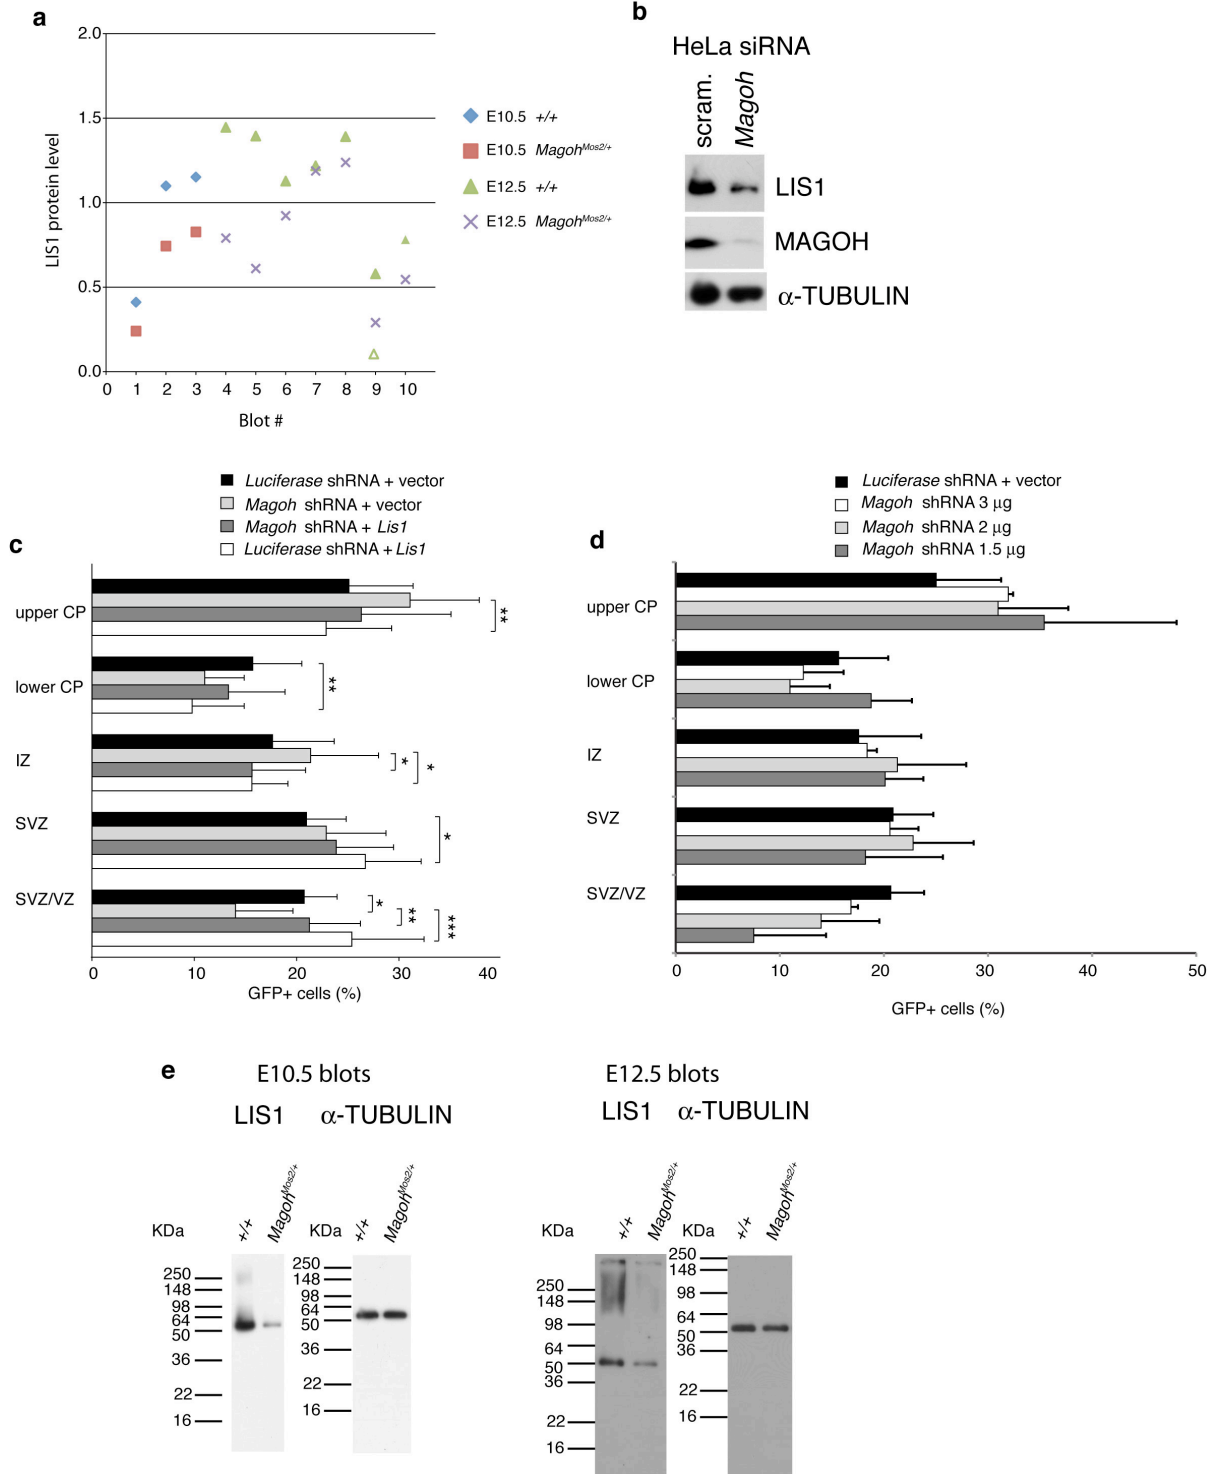

**Supplementary Figure 8 Analyses of LIS1 expression and *In utero* electroporations.**

**a**, Graph representing LIS1 protein levels, normalized for loading. Average measurements from 10 different blots which each include 4 pairs of mutant and control are shown. Note that in all experiments, LIS1 levels are lower in *Magoh*<sup>Mos2/+</sup>. **b**, Western analysis of LIS1 and Magoh protein on scrambled and *Magoh* siRNA-treated HeLa cells. **c**, Graph representing distribution of GFP-positive cells in different layers of the cortex from *in utero* electroporated brains, as shown. **d**, Graph representing distribution of GFP-positive cells in different layers of the cortex from brains electroporated with various dosages of *Magoh* shRNA, as shown. **e**, Full-length Western blots of data shown in Figure 6b. \*,  $P < 0.05$ , \*\*,  $P < 0.005$ , \*\*\*,  $P < 0.0005$ ; Error bars, s.d.

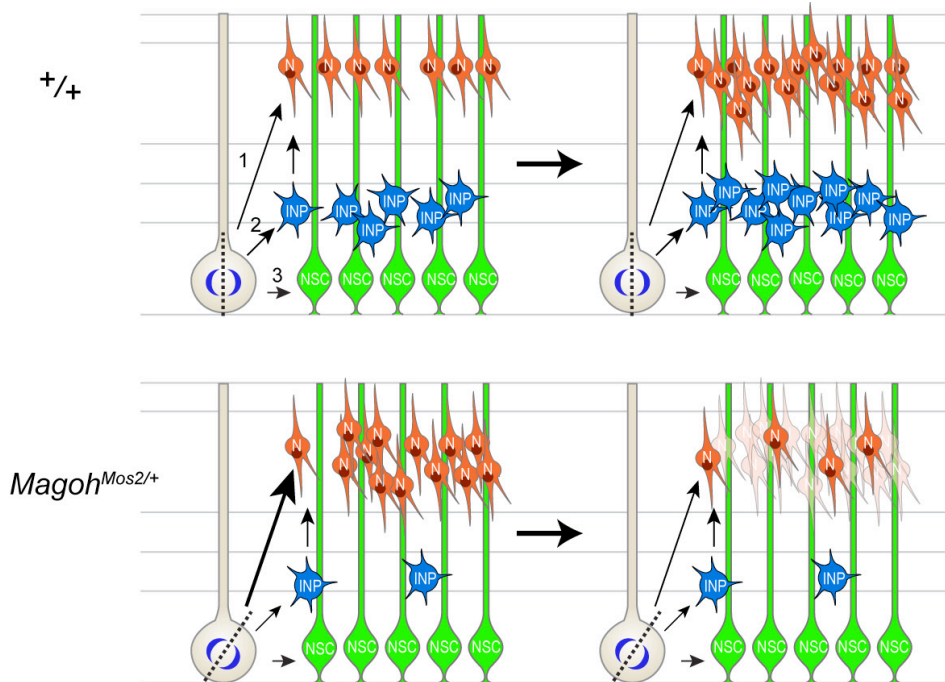

**Supplementary Figure 9 Model of *Magoh*<sup>Mos2/+</sup> phenotype.** Graphic representation of neurogenesis in control (top) and *Magoh*<sup>Mos2/+</sup> brains (bottom). In control brains, apically dividing neural stem cells (NSCs) undergo three types of divisions: (1) neurogenic asymmetric divisions to directly produce neurons (N) and NSCs, (2) proliferative asymmetric divisions to produce NSCs and intermediate neural progenitors (INPs) which then generate neurons, (3) proliferative symmetric divisions to self-renew (3). In *Magoh*<sup>Mos2/+</sup> brains, NSCs are not reduced, but INPs are depleted, and neurons are increased but subsequently undergo apoptosis. In the proposed model, a shift in asymmetric divisions (increased type 1 and decreased type 2) produces ectopic neurons and fewer INPs, without affecting NSC number. Another possible mechanism (not shown) is that in *Magoh*<sup>Mos2/+</sup> brains INPs are produced but prematurely differentiate into neurons. We propose that in *Magoh*<sup>Mos2/+</sup> mice, alterations in mitotic spindle integrity and cell division of NSCs (either through misoriented or dysfunctional mitotic spindles, as shown) influences cell fates of neurons and INPs.

| <b>Body part</b> | <b>Control<br/>(avg. g)</b> | <b><i>Magoh</i><sup>Mos2/+</sup><br/>(avg. g)</b> | <b>Normalized<br/>% change</b> | <b><i>P</i> value</b> |
|------------------|-----------------------------|---------------------------------------------------|--------------------------------|-----------------------|
| Body             | 39.48 g                     | 25.96 g                                           | 33 % lower                     | 0.046*                |
| Brain            | 0.509 g                     | 0.234 g                                           | 28 % lower                     | 0.045*                |
| Thymus           | 0.032 g                     | 0.023 g                                           | 1.1% higher                    | 0.532                 |
| Heart            | 0.191 g                     | 0.139 g                                           | 1.1 % higher                   | 0.456                 |
| Spleen           | 0.098 g                     | 0.062 g                                           | 3 % lower                      | 0.892                 |
| Liver            | 1.585 g                     | 1.206 g                                           | 1.2 % higher                   | 0.290                 |
| Kidney           | 0.464 g                     | 0.392 g                                           | 1.3 % higher                   | 0.131                 |

**Supplementary Table 1.** Body and organ weights of control and *Magoh*<sup>Mos2/+</sup> animals. Measured average (avg.) organ weights (g) and percentage difference (*Magoh*<sup>Mos2/+</sup> value/control value). For all except body weight, percentage difference was calculated after normalization for body weight, and *P* values indicate differences in normalized values. For each genotype, three age and gender matched animals were analyzed.



| mutant /wt | P value | Gene Name                                                                         | Gene ID        | AFFY cluster ID |
|------------|---------|-----------------------------------------------------------------------------------|----------------|-----------------|
| 0.46       | 0.0475  | PREDICTED: Mus musculus similar to Sycp3 like Y-linked (LOC621831), misc RNA.     | -              | 10608382        |
| 0.48       | 0.0122  | T-box brain gene 1                                                                | <i>Tbr1</i>    | 10472313        |
| 0.51       | 0.0085  | Solute carrier family 17                                                          | <i>Slc17a6</i> | 10553501        |
| 0.52       | 0.0007  |                                                                                   | -              | 10354229        |
| 0.53       | 0.0022  | Fatty acid binding protein 7, brain                                               | <i>Fabp7</i>   | 10363224        |
| 0.53       | 0.0442  | ncrna:snoRNA<br>chromosome:NCBIM36:7:59750814:59750907:-1 gene:ENSMUSG00000075807 | -              | 10564183        |
| 0.56       | 0.0009  | Mago-nashi homolog, proliferation-associated (Drosophila)                         | <i>Magoh</i>   | 10506736        |
| 0.57       | 0.0246  | Vomer nasal 1 receptor, D21                                                       | <i>V1rd21</i>  | 10550770        |
| 0.57       | 0.0057  | Tbr2                                                                              | <i>Eomes</i>   | 10589994        |
| 0.58       | 0.0213  | Ornithine decarboxylase antizyme 1                                                | <i>Oaz1</i>    | 10364909        |
| 0.60       | 0.0055  | RAS guanyl releasing protein 1                                                    | <i>Rasgrp1</i> | 10486061        |
| 0.60       | 0.0217  | Doublecortin (Dcx), transcript variant 4                                          | <i>Dcx</i>     | 10607156        |
| 0.61       | 0.0053  | Protein tyrosine phosphatase, receptor type Z, polypeptide 1                      | <i>Ptprz1</i>  | 10536667        |
| 0.62       | 0.0185  | Mus musculus R38c snoRNA                                                          | -              | 10386093        |
| 0.63       | 0.0038  | Glycoprotein m6b                                                                  | <i>Gpm6b</i>   | 10603151        |
| 0.63       | 0.0063  | CDNA clone IMAGE:6819393                                                          | -              | 10406461        |
| 0.64       | 0.0096  | Hydroxyprostaglandin dehydrogenase 15 (NAD)                                       | <i>Hpgd</i>    | 10571840        |
| 0.65       | 0.0138  | Neural zinc finger protein NZF-2b                                                 | <i>Myt1</i>    | 10479698        |
| 0.65       | 0.0127  | Distal-less homeobox 1                                                            | <i>Dlx1</i>    | 10472809        |
| 0.65       | 0.0020  | Tubulin, beta 3                                                                   | <i>Tubb3</i>   | 10576332        |
| 0.65       | 0.0046  | Crystallin, mu                                                                    | <i>Crym</i>    | 10567546        |
| 0.66       | 0.0066  | Insulin-like growth factor binding protein-like 1                                 | <i>Igfbp11</i> | 10512721        |
| 0.67       | 0.0304  | similar to Ina protein                                                            | -              | 10463737        |
| 0.67       | 0.0377  |                                                                                   | -              | 10550320        |
| 0.67       | 0.0131  | Tweety homolog 1 (Drosophila)                                                     | <i>Ttyh1</i>   | 10549594        |
| 0.67       | 0.0047  | Endothelin receptor type B                                                        | <i>Ednrb</i>   | 10422164        |
| 0.68       | 0.0050  | Guanine nucleotide binding protein (G protein), gamma 3                           | <i>Gng3</i>    | 10465820        |
| 0.68       | 0.0434  |                                                                                   | -              | 10582572        |
| 0.68       | 0.0371  |                                                                                   | -              | 10439889        |
| 0.68       | 0.0018  | Junction adhesion molecule 2                                                      | <i>Jam2</i>    | 10436666        |
| 0.68       | 0.0177  | Strain C57BL/6J nuclear factor I/B                                                | <i>Nfib</i>    | 10514049        |
| 0.68       | 0.0118  |                                                                                   | -              | 10562546        |

|      |        |                                                                                                 |                 |          |
|------|--------|-------------------------------------------------------------------------------------------------|-----------------|----------|
| 0.69 | 0.0207 | SPARC-like 1                                                                                    | <i>Sparcl1</i>  | 10531931 |
| 0.69 | 0.0020 | Microtubule-associated protein 2                                                                | <i>Mtap2</i>    | 10347036 |
| 0.69 | 0.0134 | POU domain, class 3, transcription factor 4                                                     | <i>Pou3f4</i>   | 10601459 |
| 0.69 | 0.0425 | cdna:known<br>chromosome:NCBIM36:10:21756008:21757495:-1 gene:ENSMUSG00000069712                | -               | 10368222 |
| 0.69 | 0.0477 | Secretogranin III                                                                               | <i>Scg3</i>     | 10595033 |
| 0.69 | 0.0009 | Fasciculation and elongation protein zeta 1 (zygin I)                                           | <i>Fez1</i>     | 10584259 |
| 0.70 | 0.0436 |                                                                                                 | -               | 10582584 |
| 0.70 | 0.0057 | ELAV (embryonic lethal, abnormal vision, Drosophila)-like 4 (Hu antigen D) transcript variant 1 | <i>Elavl4</i>   | 10515095 |
| 0.70 | 0.0431 | B-cell CLL/lymphoma 11A (zinc finger protein)                                                   | <i>Bcl11a</i>   | 10374727 |
| 0.70 | 0.0289 | Immunoglobulin superfamily containing leucine-rich repeat 2                                     | <i>Islr2</i>    | 10594048 |
| 0.70 | 0.0057 | Cysteine dioxygenase 1, cytosolic                                                               | <i>Cdo1</i>     | 10458828 |
| 0.70 | 0.0097 | Calcium channel, voltage-dependent, alpha2/delta subunit 1 transcript variant e                 | <i>Cacna2d1</i> | 10519815 |
| 0.71 | 0.0177 | similar to spermiogenesis specific transcript on the Y 1                                        | -               | 10608613 |
| 0.71 | 0.0335 | cdna:known<br>chromosome:NCBIM36:16:77479609:77479770:1 gene:ENSMUSG00000074941                 | -               | 10436598 |
| 0.71 | 0.0053 | T-box 22                                                                                        | <i>Tbx22</i>    | 10601433 |
| 0.71 | 0.0371 | Deleted in colorectal carcinoma                                                                 | <i>Dcc</i>      | 10459671 |
| 0.71 | 0.0010 | Secernin 1                                                                                      | <i>Scrn1</i>    | 10544875 |
| 0.71 | 0.0382 | Scot mRNA for succinyl CoA transferase                                                          | <i>Oxct1</i>    | 10422608 |
| 0.71 | 0.0134 | Rho, GDP dissociation inhibitor (GDI) beta                                                      | <i>Arhgdib</i>  | 10548892 |
| 0.71 | 0.0153 | ATP-binding cassette, sub-family D (ALD), member 2                                              | <i>Abcd2</i>    | 10431697 |
| 0.71 | 0.0202 | ncrna:snoRNA<br>chromosome:NCBIM36:2:129969457:129969528:1 gene:ENSMUSG00000065272              | -               | 10476106 |
| 0.72 | 0.0192 | Transmembrane protein 35                                                                        | <i>Tmem35</i>   | 10601701 |
| 0.72 | 0.0122 | RNA-binding protein mHuC-S                                                                      | <i>Elavl3</i>   | 10591706 |
| 0.72 | 0.0059 | Eph-related receptor tyrosine kinase (Mek4) secreted                                            | <i>Epha3</i>    | 10440258 |
| 0.72 | 0.0018 | Ca <sup>2+</sup> -dependent secretion activator (Cadps), transcript variant 1                   | <i>Cadps</i>    | 10417628 |
| 0.73 | 0.0086 | Potassium channel, subfamily K, member 10                                                       | <i>Kcnk10</i>   | 10401987 |
| 0.73 | 0.0122 | Dihydropyrimidinase-like 4                                                                      | <i>Dpysl4</i>   | 10558481 |

|      |        |                                                                                                     |                           |          |
|------|--------|-----------------------------------------------------------------------------------------------------|---------------------------|----------|
| 0.73 | 0.0191 |                                                                                                     | -                         | 10584600 |
| 0.73 | 0.0114 | Suppression of tumorigenicity 18                                                                    | <i>St18</i>               | 10344679 |
| 0.73 | 0.0048 | Transgelin 3 (Tagln3)                                                                               | <i>Tagln3</i>             | 10439695 |
| 0.73 | 0.0115 | Rho family GTPase 2                                                                                 | <i>Rnd2</i>               | 10381416 |
| 0.74 | 0.0443 | Lysozyme 2                                                                                          | <i>Lyz2</i>               | 10372648 |
| 0.74 | 0.0099 | Neurogenin 2                                                                                        | <i>Neurog2</i>            | 10495964 |
| 0.74 | 0.0436 | ncrna:snoRNA<br>chromosome:NCBIM36:5:130104248:130<br>104382:1 gene:ENSMUSG00000065304              | -                         | 10526085 |
| 0.74 | 0.0088 | Thymosin, beta 4, X chromosome                                                                      | <i>Tmsb4x</i>             | 10607865 |
| 0.74 | 0.0425 | Delta-like 3 (Drosophila)                                                                           | <i>Dll3</i>               | 10561376 |
| 0.74 | 0.0125 | RIKEN cDNA 6330403K07 gene                                                                          | <i>6330403<br/>K07Rik</i> | 10388042 |
| 0.74 | 0.0246 | LIM-homeodomain protein                                                                             | <i>Lhx8</i>               | 10502961 |
| 0.74 | 0.0190 | Ectonucleoside triphosphate<br>diphosphohydrolase 1                                                 | <i>Entpd1</i>             | 10463070 |
| 0.74 | 0.0016 | cdna:known<br>chromosome:NCBIM36:12:54991829:549<br>93367:1 gene:ENSMUSG00000073093                 | -                         | 10395733 |
| 0.74 | 0.0138 | Zinc finger, CCHC domain containing 12                                                              | <i>Zcchc12</i>            | 10599187 |
| 0.74 | 0.0138 | Tubulin, beta 2B                                                                                    | <i>Tubb2b</i>             | 10399419 |
| 0.74 | 0.0488 | Interferon-induced protein with<br>tetratricopeptide repeats 2                                      | <i>Ifit2</i>              | 10462613 |
| 0.74 | 0.0138 | Glycoprotein m6a                                                                                    | <i>Gpm6a</i>              | 10571815 |
| 0.74 | 0.0205 | Homeobox, msh-like 2                                                                                | <i>Msx2</i>               | 10409314 |
| 0.74 | 0.0378 | Coagulation factor XIII, A1 subunit                                                                 | <i>F13a1</i>              | 10408693 |
| 0.75 | 0.0011 | Neuron specific gene family member 1                                                                | <i>Nsg1</i>               | 10529656 |
| 0.75 | 0.0141 | Cyclin-dependent kinase inhibitor 1C<br>(P57)                                                       | <i>Cdkn1c</i>             | 10569429 |
| 0.75 | 0.0417 | Distal-less homeobox 2                                                                              | <i>Dlx2</i>               | 10483626 |
| 0.75 | 0.0425 | Chemokine (C-X-C motif) ligand 13                                                                   | <i>Cxcl13</i>             | 10523359 |
| 0.75 | 0.0151 |                                                                                                     | -                         | 10602733 |
| 0.75 | 0.0010 | P21-activated kinase 3                                                                              | <i>Pak3</i>               | 10602198 |
| 1.34 | 0.0473 | cdna:known<br>chromosome:NCBIM36:11:9875883:9876<br>050:-1 gene:ENSMUSG00000069964                  | -                         | 10598794 |
| 1.34 | 0.0306 | Carbonic anhydrase 4                                                                                | <i>Car4</i>               | 10379866 |
| 1.34 | 0.0292 | Phospholipase C, gamma 2                                                                            | <i>Plcg2</i>              | 10575799 |
| 1.34 | 0.0138 | Arrestin domain containing 3                                                                        | <i>Arrdc3</i>             | 10406407 |
| 1.34 | 0.0182 | cdna:known<br>chromosome:NCBIM36:5:62890685:6303<br>7911:-1 gene:ENSMUSG00000037999                 | -                         | 10530100 |
| 1.34 | 0.0027 | A disintegrin-like and metallopeptidase<br>(reprolysin type) with thrombospondin<br>type 1 motif, 3 | <i>Adamts3</i>            | 10531201 |

|      |        |                                                                                               |                           |          |
|------|--------|-----------------------------------------------------------------------------------------------|---------------------------|----------|
| 1.35 | 0.0138 | Solute carrier family 2 (facilitated glucose transporter), member 3                           | <i>Slc2a3</i>             | 10547641 |
| 1.35 | 0.0018 | Proline/serine-rich coiled-coil 1                                                             | <i>Psrc1</i>              | 10495316 |
| 1.35 | 0.0246 | A disintegrin-like and metallopeptidase (reprolysin type) with thrombospondin type 1 motif, 3 | <i>Adamts3</i>            | 10531197 |
| 1.35 | 0.0225 | Solute carrier family 4 (anion exchanger), member 1                                           | <i>Slc4a1</i>             | 10391649 |
| 1.35 | 0.0019 | BCL2-associated X protein                                                                     | <i>Bax</i>                | 10563303 |
| 1.35 | 0.0304 | A disintegrin-like and metallopeptidase (reprolysin type) with thrombospondin type 1 motif, 3 | <i>Adamts3</i>            | 10531177 |
| 1.36 | 0.0122 | Mitogen-activated protein kinase-activated protein kinase 3                                   | <i>Mapkapk3</i>           | 10596637 |
| 1.36 | 0.0213 | Premature mRNA for mKIAA0233 protein                                                          | <i>Fam38a</i>             | 10582337 |
| 1.36 | 0.0293 | Polymerase (DNA directed), kappa                                                              | <i>Polk</i>               | 10411306 |
| 1.36 | 0.0334 | cdna:Genscan<br>chromosome:NCBIM36:6:92752350:9290<br>8659:-1                                 | -                         | 10546450 |
| 1.37 | 0.0425 | A disintegrin-like and metallopeptidase (reprolysin type) with thrombospondin type 1 motif, 3 | <i>Adamts3</i>            | 10531175 |
| 1.38 | 0.0089 | RIKEN cDNA 1700007K13 gene                                                                    | <i>1700007<br/>K13Rik</i> | 10481272 |
| 1.39 | 0.0038 | cdna:known<br>chromosome:NCBIM36:3:12838528:1283<br>8935:1 gene:ENSMUSG00000045699            | -                         | 10518346 |
| 1.40 | 0.0106 | RIKEN cDNA 4933426M11 gene                                                                    | <i>4933426<br/>M11Rik</i> | 10396919 |
| 1.40 | 0.0064 | MKIAA1991 protein                                                                             | <i>Rnf169</i>             | 10565852 |
| 1.40 | 0.0377 | Six6 opposite strand transcript 1                                                             | <i>Six6os1</i>            | 10400948 |
| 1.40 | 0.0138 | Strain ILS glutamate receptor subunit 3                                                       | <i>Gria3</i>              | 10599348 |
| 1.41 | 0.0325 |                                                                                               | -                         | 10528476 |
| 1.41 | 0.0192 | RIKEN cDNA 2410018L13 gene                                                                    | <i>2410018<br/>L13Rik</i> | 10394833 |
| 1.42 | 0.0053 | PLZF gene                                                                                     | <i>Zbtb16</i>             | 10593225 |
| 1.42 | 0.0304 |                                                                                               | -                         | 10550181 |
| 1.42 | 0.0422 | cDNA sequence BC039210                                                                        | -                         | 10582376 |
| 1.42 | 0.0126 | Carnitine palmitoyltransferase 1c                                                             | <i>Cpt1c</i>              | 10562989 |
| 1.44 | 0.0114 | Ras homolog gene family, member D                                                             | <i>Rhod</i>               | 10464754 |
| 1.45 | 0.0141 | cdna:known<br>chromosome:NCBIM36:15:61867652:620<br>72228:1 gene:ENSMUSG00000072566           | -                         | 10424404 |
| 1.45 | 0.0169 | MI0000687 miR-17 stem-loop                                                                    | -                         | 10416948 |
| 1.46 | 0.0138 | S-adenosylhomocysteine hydrolase                                                              | <i>Ahcy</i>               | 10439762 |

|      |        |                                                                                           |                           |          |
|------|--------|-------------------------------------------------------------------------------------------|---------------------------|----------|
| 1.46 | 0.0075 | PTP36-D isoform                                                                           | <i>Ptpn14</i>             | 10352661 |
| 1.46 | 0.0007 | G two S phase expressed protein 1                                                         | <i>Gtse1</i>              | 10426016 |
| 1.47 | 0.0099 | Cyclin-dependent kinase 6                                                                 | <i>Cdk6</i>               | 10519324 |
| 1.47 | 0.0378 | Sec61 beta subunit                                                                        | <i>Sec61b</i>             | 10426889 |
| 1.47 | 0.0010 | Apoptosis enhancing nuclease                                                              | <i>Aen</i>                | 10554233 |
| 1.50 | 0.0192 | Stress-induced protein SIP18 (Sip)                                                        | <i>Trp53in<br/>p1</i>     | 10503259 |
| 1.50 | 0.0007 | Germ cell nuclear factor protein                                                          | <i>Nr6a1</i>              | 10482249 |
| 1.51 | 0.0010 | Zinc finger protein 365                                                                   | <i>Zfp365</i>             | 10369783 |
| 1.51 | 0.0065 | Lin-28 homolog (C. elegans)                                                               | <i>Lin28</i>              | 10517159 |
| 1.52 | 0.0031 | Tripartite motif-containing 71                                                            | <i>Trim71</i>             | 10597427 |
| 1.54 | 0.0057 | DNA-damage-inducible transcript 4-like,                                                   | <i>Ddit4l</i>             | 10496373 |
| 1.56 | 0.0032 | RIKEN cDNA B230120H23 gene                                                                | <i>B23012<br/>0H23Rik</i> | 10472893 |
| 1.59 | 0.0046 | Serine (or cysteine) peptidase inhibitor,<br>clade E, member 2                            | <i>Serpine2</i>           | 10355984 |
| 1.61 | 0.0087 | protogenin homolog (Gallus gallus)                                                        | <i>Prtg</i>               | 10586971 |
| 1.63 | 0.0165 | Insulin receptor substrate 4 (Irs4)                                                       | <i>Irs4</i>               | 10607059 |
| 1.63 | 0.0049 | RIKEN cDNA 4632434I11 gene                                                                | 4632434<br><i>I11Rik</i>  | 10565570 |
| 1.66 | 0.0018 | Solute carrier family 19 (thiamine<br>transporter), member 2                              | <i>Slc19a2</i>            | 10351259 |
| 1.66 | 0.0363 | cdna:known<br>chromosome:NCBIM36:1:87441024:8744<br>1395:-1 gene:ENSMUSG00000073628       | -                         | 10356291 |
| 1.68 | 0.0467 | similar to Xlr-related, meiosis regulated<br>(LOC664923), mRNA<br>gene:ENSMUSG00000073255 | -                         | 10599064 |
| 1.75 | 0.0018 | tumor necrosis factor receptor superfamily,<br>member 10b                                 | <i>Tnfrsf10<br/>b</i>     | 10416230 |
| 1.92 | 0.0044 | Anoctamin 3, transcript variant 2                                                         | <i>Ano3</i>               | 10485718 |
| 1.93 | 0.0007 | Sestrin 2                                                                                 | <i>Sesn2</i>              | 10516932 |
| 2.13 | 0.0020 | Adenylate kinase 1                                                                        | <i>Ak1</i>                | 10471474 |
| 2.16 | 0.0012 | RIKEN cDNA 4930429B21 gene                                                                | <i>Zmat3</i>              | 10497673 |
| 2.17 | 0.0010 | Pleckstrin homology-like domain, family<br>A, member 3                                    | <i>Phlda3</i>             | 10350146 |
| 2.49 | 0.0057 | cdna:novel<br>chromosome:NCBIM36:2:110458979:110<br>459164:-1 gene:ENSMUSG00000074969     | -                         | 10485745 |
| 2.72 | 0.0325 | Vomer nasal 2, receptor 50                                                                | <i>Vmn2r4<br/>3</i>       | 10559883 |

|      |        |                                           |               |          |
|------|--------|-------------------------------------------|---------------|----------|
| 2.87 | 0.0007 | Cyclin G1                                 | <i>Ccng1</i>  | 10385271 |
| 3.10 | 0.0007 | Cyclin-dependent kinase inhibitor 1A(P21) | <i>Cdkn1a</i> | 10443463 |
| 5.09 | 0.0007 | Ectodysplasin A2 isoform receptor         | <i>Eda2r</i>  | 10605874 |

**Supplementary Table 2** Microarray analysis of E10.5 cortices. Shown are average transcript levels as a ratio of *Magoh*<sup>Mos2/+</sup>/control, actual *P* values, gene name, gene symbol, and Affymetrix transcript cluster ID. Shown are those transcripts for which *P*<0.05 and with levels altered by at least 25%. Microarray data was generated from 5 biological replicates each of RNA from control and *Magoh*<sup>Mos2/+</sup> E10.5 cortices. *P* values were calculated using unpaired two-tailed t test. Data were corrected with Benjamini and Hochberg and are log transformed.

| <b>Figure #</b> | <b>Statistical Test</b> | <b>Measurement</b>                               | <b>Actual P value</b> |
|-----------------|-------------------------|--------------------------------------------------|-----------------------|
| 1b              | t test                  | <b>brain size/body size</b>                      | 0.045                 |
| 1e              | t test                  | <b>gene expression</b>                           |                       |
|                 |                         | magoh RNA 10.5                                   | 0.0001                |
|                 |                         | magoh RNA 12.5                                   | 0.0001                |
| 3o              | t test                  | <b>Pax6 density</b>                              |                       |
|                 |                         | E13.5                                            | 0.3401                |
|                 |                         | E14.5                                            | 0.0674                |
|                 |                         | E16.5                                            | 0.3416                |
| 3q              | t test                  | <b>Tbr2 density</b>                              |                       |
|                 |                         | E13.5                                            | 0.0016                |
|                 |                         | E14.5                                            | 0.0027                |
|                 |                         | E16.5                                            | 0.010961797           |
| 3p              | t test                  | <b>VZ thickness</b>                              |                       |
|                 |                         | E13.5                                            | 0.056569183           |
|                 |                         | E14.5                                            | 0.124822923           |
| 3r              | t test                  | <b>BrdU+Tbr2+</b>                                |                       |
|                 |                         | %Tbr2                                            | 0.113785335           |
|                 |                         | %BrdU                                            | 0.013072306           |
| 4o              | fisher's test           | <b>#TuJ1vs.nonTuJ1</b>                           | <0.0001               |
| 4p              | t test                  | <b>IZ,CP thickness</b>                           |                       |
|                 |                         | E13.5                                            | 0.002194927           |
|                 |                         | E14.5                                            | 0.00354797            |
| S6A, 5b         | chi square analysis     | <b>mitotic orientation</b>                       |                       |
|                 |                         | E10.5                                            | 0.97                  |
|                 |                         | E11.5                                            | 0.001086296           |
|                 |                         | E12.5                                            | 0.011086495           |
| 5c              | fisher's test           | <b>%cells</b>                                    |                       |
|                 |                         | polyploidy                                       | p=2.26E-9             |
|                 |                         | aneuloidy                                        | p=0.00041             |
| 5i              | t test                  | <b>avg.centrosome distance</b>                   | <0.0001               |
| 5j              | t test                  | <b>%monopolar spindles relative to scrambled</b> |                       |
|                 |                         | <i>Magoh</i>                                     | 0.002249217           |
|                 |                         | <i>Rbm8a</i>                                     | 0.000686706           |
|                 |                         | <i>Eifa3</i>                                     | 0.00683902            |
|                 |                         | <i>Casc3</i>                                     | 0.065469945           |
| 5k              | t test                  | <b>#<math>\gamma</math>-H2AX cells</b>           |                       |
|                 |                         | E11.5                                            | 0.005203198           |
|                 |                         | E12.5                                            | 0.002324296           |
|                 |                         | E13.5                                            | 0.011882207           |

|     |                     |                                         |              |
|-----|---------------------|-----------------------------------------|--------------|
|     |                     | E14.5                                   | 0.00171028   |
| 5n  | chi square analysis | <b>γ-H2AXfoci relative to scrambled</b> |              |
|     |                     | <i>Magoh</i>                            | <0.001       |
|     |                     | <i>Rbm8a</i>                            | <0.001       |
|     |                     | <i>Casc3</i>                            | <0.001       |
|     |                     | <i>Eif4a3</i>                           | <0.001       |
| S2h | t test              | <b>brain dimensions</b>                 |              |
|     |                     | length b6-or                            | 3.26326E-06  |
|     |                     | width b6-or                             | 3.60682E-06  |
|     |                     | length bac;or-or                        | 2.63362E-06  |
|     |                     | width bac;or-or                         | 0.002378577  |
| S3a | t test              | <b>neuronal thickness</b>               |              |
|     |                     | Foxp1                                   | 0.004098614  |
|     |                     | Foxp2                                   | 0.009130009  |
|     |                     | Tbr1                                    | 0.010837506  |
| S3b | t test              | <b>total # neurons</b>                  | 0.000708535  |
| S3c | t test              | <b>cortical thickness</b>               |              |
|     |                     | E11.5                                   | 0.327108122  |
|     |                     | E12.5                                   | 0.043235011  |
|     |                     | E13.5                                   | 1.84194E-05  |
|     |                     | E14.5                                   | 1.47209E-05  |
| S4b | t test              | <b>BrdU in SVZ/IC/CP</b>                | 0.000749908  |
| S4c | t test              | <b>BrdU density</b>                     | 0.110041523  |
| S6b | t test              | <b># PH3 cells</b>                      |              |
|     |                     | E10.5                                   | 0.264256403  |
|     |                     | E14.5                                   | 0.402250288  |
|     |                     | <b>gene expression</b>                  |              |
| S8a | t test              | lis1-10.5                               | 0.0001       |
|     |                     | lis1-12.5                               | 0.9898       |
| S4d | t test              | pax6-12.6                               | 0.733        |
| S4d | t test              | tbr2-12.5                               | 0.001        |
| S7c | t test              | <b>gene expression</b>                  |              |
|     |                     | rbm8a                                   | 0.042        |
|     |                     | casc3                                   | 0.039        |
|     |                     | ddx48                                   | 0.023        |
|     |                     | magoh1                                  | 0.035        |
|     |                     | magoh2                                  | 0.059        |
| 6f  | t test              | <b>electroporations</b>                 | t test lucif |
|     |                     | <b>%Tbr2+cells/GFP</b>                  |              |
|     |                     | lucif                                   |              |
|     |                     | magoh vs lucif                          | 0.04098      |
|     |                     | magoh+lis vs lucif                      | 0.813        |
|     |                     | lis alone vs. lucif                     | 0.041551015  |
|     |                     | magoh+lis vs magoh                      | 0.029204646  |



|        |        |                         |             |
|--------|--------|-------------------------|-------------|
|        |        | lis alone vs. magoh     | 0.001054589 |
|        |        | lis alone vs. Magoh+lis | 0.106835566 |
| 6d,s8c | t-test | <b>Electroporations</b> |             |
|        |        | <b>Magoh shRNA vs.</b>  |             |
|        |        | <b>Luciferase shRNA</b> |             |
|        |        | outer cp                | 0.022855816 |
|        |        | cp                      | 0.008822419 |
|        |        | iz                      | 0.196402522 |
|        |        | svz                     | 0.362332387 |
|        |        | lower svz/vz            | 0.001697782 |
|        |        | <b>Magoh shRNA vs.</b>  |             |
|        |        | <b>LIS1 rescue</b>      |             |
|        |        | outer cp                | 0.027018164 |
|        |        | cp                      | 0.101226367 |
|        |        | iz                      | 0.021996517 |
|        |        | svz                     | 0.474832994 |
|        |        | lower svz/vz            | 0.000671697 |
|        |        | <b>Magoh shRNA vs.</b>  |             |
|        |        | <b>LIS1 alone</b>       |             |
|        |        | outer cp                | 0.001042953 |
|        |        | cp                      | 0.428024035 |
|        |        | iz                      | 0.013383953 |
|        |        | svz                     | 0.052360689 |
|        |        | lower svz/vz            | 1.41685E-05 |
|        |        | <b>Luciferase shRNA</b> |             |
|        |        | <b>Vs.LIS1 rescue</b>   |             |
|        |        | outer cp                | 0.944024334 |
|        |        | cp                      | 0.214317145 |
|        |        | iz                      | 0.349955854 |
|        |        | svz                     | 0.051506021 |
|        |        | lower svz/vz            | 0.552206334 |
|        |        | <b>Lis1 alone v.</b>    |             |
|        |        | <b>Luciferase shRNA</b> |             |
|        |        | outer cp                | 0.312030895 |
|        |        | cp                      | 0.001619618 |
|        |        | iz                      | 0.272431828 |
|        |        | svz                     | 0.001009096 |
|        |        | lower svz/vz            | 0.012730874 |
|        |        | <b>Lis1 alone v.</b>    |             |
|        |        | <b>Lis1 rescue</b>      |             |
|        |        | outer cp                | 0.283458359 |
|        |        | cp                      | 0.020204393 |
|        |        | iz                      | 0.900414323 |
|        |        | svz                     | 0.125486243 |
|        |        | lower svz/vz            | 0.045299940 |

**Supplementary Table 3. Statistical analyses.** All t-tests were unpaired, two-tailed. “s” refers to Supplementary Figure.

**Supplementary Data 1.** Serum chemistries, hematology, and organ weights of control and mutant animals. Excel spreadsheets reporting values measured for individual animals and average values for (1) hematological values measured in blood, (2) serum chemistries, (3) organ weights.
